# Supplementary material for: Towards a Pharmacophore for Amyloid
Source: PubMed Central journal article supplement (PMC3114762; doi:10.1371/journal.pbio.1001080), 2011-06-14
Supplement: pbio.1001080.s007.pdf [file pbio.1001080.s007.pdf]

## Towards a Pharmacophore for Amyloid

Meytal Landau, Michael R. Sawaya, Kym F. Faull, Arthur Laganowsky, Lin Jiang, Stuart A. Sievers, Jie Liu, Jorge R. Barrio and David Eisenberg

**Supporting Table S1**

| Small Molecule | Amyloid-like segment                                                                   | Co-crystallization result                                        |
|----------------|----------------------------------------------------------------------------------------|------------------------------------------------------------------|
| Orange G       | VQIVYK from tau                                                                        | Structure of the complex was determined (Fig 3).                 |
|                | KLVFFA (residues 16-21) from A $\beta$                                                 | Structure of the complex was determined (Fig. 1).                |
|                | KLVFFG (residues 16-21) – Flemish (A21G) mutation from A $\beta$                       | Crystals with x-ray diffraction too poor to determine structure. |
|                | KLVFFAK (residues 16-22) – Italian (E22K) mutation from A $\beta$                      | No crystals.                                                     |
|                | KLVFFAG (residues 16-22) - Artic (E22G) mutation from A $\beta$                        | Fibrous crystals.                                                |
|                | KLVFFAEN (residues 16-23) - Iowa (D23N) mutations from A $\beta$                       | Crystals with x-ray diffraction too poor to determine structure. |
|                | KLVFFAENVG (residues 16-25) – Iowa (D23N) mutations from A $\beta$                     | No crystals.                                                     |
|                | KLVFFAGNVGSNK (residues 16-28) - Artic (E22G) and Iowa (D23N) mutations from A $\beta$ | No crystals.                                                     |
|                | GDVGSNK (residues 22-28) – Artic (E22G) mutation from A $\beta$                        | No crystals.                                                     |
|                | QDVGSNK (residues 22-28) - Dutch (E22Q) mutation from A $\beta$                        | No crystals.                                                     |
|                | GGVVIA (residues 37-42) from A $\beta$                                                 | Crystals with x-ray diffraction too poor to determine structure. |
|                | LVFFAEDVGSNKGAI IGLMVGGVV (residues 17-40) from A $\beta$                              | No crystals.                                                     |
|                | LVFFAEDVGSNKGAI IGLMVGGVVIA (residues 17-42) from A $\beta$                            | Fibrous crystals.                                                |
|                | GVVEVD (residues 734-739) from A $\beta$ A4 protein (APP)                              | Structure of orange-G alone.                                     |
|                | GDVIEV from $\alpha$ -crystalline                                                      | Crystals with x-ray diffraction too poor to determine structure. |

|                     |                                                           |                                                                                                       |
|---------------------|-----------------------------------------------------------|-------------------------------------------------------------------------------------------------------|
|                     | SSTNVG from amylin                                        | All crystals formed (under various crystallization conditions) were colorless and not tested further. |
|                     | GNNQQNY from yeast prion protein Sup35                    | All crystals formed (under various crystallization conditions) were colorless and not tested further. |
| Curcumin            | VQIVYK from tau                                           | Structure of the complex was determined (Fig. 4).                                                     |
|                     | KLVFFA (residues 16-21) from A $\beta$                    | Crystals with x-ray diffraction too poor to determine structure.                                      |
|                     | GGVVIA (residues 37-42) from A $\beta$                    | Structure of GGVVIA alone.                                                                            |
|                     | GVVEVD (residues 734-739) from A $\beta$ A4 protein (APP) | Crystals with x-ray diffraction too poor to determine structure.                                      |
|                     | GDVIEV from $\alpha$ -crystalline                         | Crystals with x-ray diffraction too poor to determine structure.                                      |
|                     | SSTNVG from amylin                                        | Structure of SSTNVG alone.                                                                            |
| Phenol Red          | VQIVYK from tau                                           | Crystals with x-ray diffraction too poor to determine structure.                                      |
|                     | GGVVIA (residues 37-42) from A $\beta$                    | Structure of GGVVIA alone.                                                                            |
|                     | SSTNVG from amylin                                        | Crystals with x-ray diffraction too poor to determine structure.                                      |
|                     | NFGAILSS (residues 22-29) from amylin                     | No crystals.                                                                                          |
|                     | SSNFGAILSS (residues 19-29) from amylin                   | No crystals.                                                                                          |
|                     | SNNFGAILSS (residues 20-29) from amylin                   | Crystals with x-ray diffraction too poor to determine structure.                                      |
| Thioflavin T        | VQIVYK from tau                                           | Structure of thioflavin T alone.                                                                      |
|                     | KLVFFA (residues 16-21) from A $\beta$                    | Structure of KLVFFA alone.                                                                            |
|                     | GGVVIA (residues 37-42) from A $\beta$                    | Crystals with x-ray diffraction too poor to determine structure.                                      |
|                     | GVVEVD (residues 734-739) from A $\beta$ A4 protein (APP) | Structure of GVVEVD alone in a unique anti-parallel packing.                                          |
|                     | GDVIEV from $\alpha$ -crystalline                         | Crystals with x-ray diffraction too poor to determine structure.                                      |
| Chicago sky blue 6B | VQIVYK from tau                                           | Crystals with x-ray diffraction too poor to determine structure.                                      |
|                     | GGVVIA (residues 37-42) from A $\beta$                    | Structure of GGVVIA alone.                                                                            |
| Rhodamine B         | VQIVYK from tau                                           | Structure of VQIVYK alone.                                                                            |
|                     | GGVVIA (residues 37-42) from A $\beta$                    | Crystals with x-ray diffraction too poor to determine structure.                                      |
| Azure C             | VQIVYK from tau                                           | Crystals with x-ray diffraction                                                                       |

|                                            |                                        |                                                                  |
|--------------------------------------------|----------------------------------------|------------------------------------------------------------------|
|                                            |                                        | too poor to determine structure.                                 |
|                                            | GGVVIA (residues 37-42) from A $\beta$ | Crystals with x-ray diffraction too poor to determine structure. |
| Rolitetracycline                           | VQIVYK from tau                        | Crystals with x-ray diffraction too poor to determine structure. |
|                                            | GGVVIA (residues 37-42) from A $\beta$ | Crystals with x-ray diffraction too poor to determine structure. |
| Myristyltrimethyl<br>-ammonium<br>bromide  | VQIVYK from tau                        | No crystals.                                                     |
|                                            | GGVVIA (residues 37-42) from A $\beta$ | Crystals with x-ray diffraction too poor to determine structure. |
| o-vanillin                                 | VQIVYK from tau                        | Crystals with x-ray diffraction too poor to determine structure. |
|                                            | GGVVIA (residues 37-42) from A $\beta$ | Crystals with x-ray diffraction too poor to determine structure. |
| Juglone                                    | VQIVYK from tau                        | Structure of VQIVYK alone.                                       |
|                                            | GGVVIA (residues 37-42) from A $\beta$ | Structure of GGVVIA alone.                                       |
| Hexadecyltrimeth<br>-ylammonium<br>bromide | VQIVYK from tau                        | Crystals with x-ray diffraction too poor to determine structure. |
|                                            | GGVVIA (residues 37-42) from A $\beta$ | Crystals with x-ray diffraction too poor to determine structure. |
| 1,2-<br>Naphthoquinone                     | VQIVYK from tau                        | Crystals with x-ray diffraction too poor to determine structure. |
|                                            | GGVVIA (residues 37-42) from A $\beta$ | Crystals with x-ray diffraction too poor to determine structure. |
| Lacmoid                                    | VQIVYK from tau                        | No crystals.                                                     |
|                                            | GGVVIA (residues 37-42) from A $\beta$ | Fibrous crystals.                                                |
| Perphenazine                               | VQIVYK from tau                        | Structure of VQIVYK alone.                                       |
| Thioflavin S                               | VQIVYK from tau                        | Structure of VQIVYK alone.                                       |
| Rifamycin SV<br>sod. Salt                  | GGVVIA (residues 37-42) from A $\beta$ | Crystals with x-ray diffraction too poor to determine structure. |
|                                            | SSTNVG from amylin                     | Structure of SSTNVG alone.                                       |
| Meclocycline<br>sulfosalicylate salt       | VQIVYK from tau                        | Crystals with x-ray diffraction too poor to determine structure. |
| Eosin Y                                    | VQIVYK from tau                        | Fibrous crystals.                                                |
|                                            | GGVVIA (residues 37-42) from A $\beta$ | Crystals with x-ray diffraction too poor to determine structure. |
| 2,2'-<br>Dihydroxybenzop<br>-henone        | GGVVIA (residues 37-42) from A $\beta$ | Structure of GGVVIA alone.                                       |
| Methylene Blue                             | VQIVYK from tau                        | Structure of Methylene Blue alone.                               |
|                                            | GGVVIA (residues 37-42) from A $\beta$ | Crystals with x-ray diffraction                                  |

|                                                     |                                                                   |                                                                  |
|-----------------------------------------------------|-------------------------------------------------------------------|------------------------------------------------------------------|
|                                                     |                                                                   | too poor to determine structure.                                 |
| Benserazide hydrochloride                           | VQIVYK from tau                                                   | Fibrous crystals.                                                |
|                                                     | GGVVIA (residues 37-42) from A $\beta$                            | Structure of GGVVIA alone.                                       |
| 2-Methoxy-4-methylphenol (Creosol)                  | VQIVYK from tau                                                   | Structure of VQIVYK alone.                                       |
|                                                     | GGVVIA (residues 37-42) from A $\beta$                            | Crystals with x-ray diffraction too poor to determine structure. |
| <i>R</i> -(-)-Apomorphine hydrochloride hemihydrate | VQIVYK from tau                                                   | Crystals with x-ray diffraction too poor to determine structure. |
|                                                     | GGVVIA (residues 37-42) from A $\beta$                            | Structure of GGVVIA alone.                                       |
| Dobutamine hydrochloride                            | VQIVYK from tau                                                   | Crystals with x-ray diffraction too poor to determine structure. |
| Neocuproine                                         | VQIVYK from tau                                                   | Structure of VQIVYK alone.                                       |
| (-)-Epigallocatechin gallate                        | VQIVYK from tau                                                   | No crystals.                                                     |
|                                                     | GGVVIA (residues 37-42) from A $\beta$                            | Structure of GGVVIA alone.                                       |
| Epicatechin                                         | VQIVYK from tau                                                   | No crystals.                                                     |
| PIB                                                 | VQIVYK from tau                                                   | Structure of VQIVYK alone.                                       |
|                                                     | KLVFFA (residues 16-21) from A $\beta$                            | Crystals with x-ray diffraction too poor to determine structure. |
| DDNP                                                | VQIVYK from tau                                                   | Structure of the complex was determined (Fig. 4).                |
|                                                     | KLVFFA (residues 16-21) from A $\beta$                            | Crystals with x-ray diffraction too poor to determine structure. |
|                                                     | KLVFFG (residues 16-21) –Flemish (A21G) mutation from A $\beta$   | Crystals with x-ray diffraction too poor to determine structure. |
|                                                     | KLVFFAK (residues 16-22) - Italian (E22K) mutation from A $\beta$ | No crystals.                                                     |
| FDDNP                                               | VQIVYK from tau                                                   | Crystals with x-ray diffraction too poor to determine structure. |
|                                                     | KLVFFA (residues 16-21) from A $\beta$                            | Structure of KLVFFA alone in a unique packing.                   |
|                                                     | LVFFAEDVGSNKGAI IGLMVGGVV (residues 17-40) from A $\beta$         | Fibrous crystals with no x-ray diffraction.                      |
|                                                     | LVFFAEDVGSNKGAI IGLMVGGVVIA (residues 17-42) from A $\beta$       | Crystals with x-ray diffraction too poor to determine structure. |
| CFDDNP                                              | KLVFFG (residues 16-21) –Flemish (A21G) mutation from A $\beta$   | Crystals with x-ray diffraction too poor to determine structure. |
|                                                     | KLVFFAK (residues 16-22) - Italian (E22K) mutation from A $\beta$ | No crystals.                                                     |
| AZET                                                | VQIVYK from tau                                                   | Structure of VQIVYK alone.                                       |
| EB-I-68                                             | KLVFFA (residues 16-21) from A $\beta$                            | Fibrous crystals.                                                |

**Table S1. Screening for co-crystals from mixtures of amyloid-like segments with small molecules.** We choose small molecules that were reported to affect fibrillation of different amyloid-forming proteins [1,2], including natural compounds [3], a thioflavin derivative: Pittsburgh compound B (PIB) [4], as well as a molecule that constitutes half of the curcumin molecule: (-)-2-Methoxy-4-methylphenol (Creosol). We also screened for complexes with biological marker that detect amyloid fibers *in vivo*, developed and synthesized by Jorge R. Barrio and co-workers [5-8].

We used 34 different small-molecules combined with different amyloid-like segments to generate 89 different mixtures. Several different molecular ratios (ranging between 1:1 and 1:10 small-molecule:segment) were tested (details not specified in the table) resulting in >100 different co-crystallization trials. Each mixture was screened for the formation of co-crystals with 768 different crystallization conditions. In many cases, crystals grown from various conditions were tested in x-ray diffraction experiments (details not specified in the table). Soaking experiments (adding the small molecule after growing crystals from the amyloid-like segment alone), performed for several of the different combinations, failed to show the presence of the small molecule.

From the 89 mixtures detailed in the Table, 4 structures of complexes were determined. 14 mixtures did not show formation of crystals in the conditions tested over several months. 47 mixtures resulted in fibrous or colorless crystals that were not tested, or crystals with x-ray diffraction too poor to allow structure determination. Crystals grown from 21 mixtures led to structure determination of the amyloid-like segment alone, while 3 revealed the presence of only the small molecule.

## References

1. Necula M, Kaye R, Milton S, Glabe CG (2007) Small molecule inhibitors of aggregation indicate that amyloid beta oligomerization and fibrillization pathways are independent and distinct. *J Biol Chem* 282: 10311-10324.
2. Yang F, Lim GP, Begum AN, Ubeda OJ, Simmons MR, et al. (2005) Curcumin inhibits formation of amyloid beta oligomers and fibrils, binds plaques, and reduces amyloid in vivo. *J Biol Chem* 280: 5892-5901.
3. Choi YT, Jung CH, Lee SR, Bae JH, Baek WK, et al. (2001) The green tea polyphenol (-)-epigallocatechin gallate attenuates beta-amyloid-induced neurotoxicity in cultured hippocampal neurons. *Life Sci* 70: 603-614.
4. Mathis CA, Bacskai BJ, Kajdasz ST, McLellan ME, Frosch MP, et al. (2002) A lipophilic thioflavin-T derivative for positron emission tomography (PET) imaging of amyloid in brain. *Bioorg Med Chem Lett* 12: 295-298.
5. Agdeppa ED, Kepe V, Liu J, Small GW, Huang SC, et al. (2003) 2-Dialkylamino-6-acylmalononitrile substituted naphthalenes (DDNP analogs): novel diagnostic and therapeutic tools in Alzheimer's disease. *Mol Imaging Biol* 5: 404-417.
6. Jacobson A, Petric A, Hogenkamp D, Sinur A, Barrio JR (1996) 1,1-Dicyano-2-[6-(dimethylamino)naphthalen-2-yl]propene (DDNP): A Solvent Polarity and Viscosity Sensitive Fluorophore for Fluorescence Microscopy. *J Am Chem Soc* 118: 5572-5579.
7. Shoghi-Jadid K, Small GW, Agdeppa ED, Kepe V, Ercoli LM, et al. (2002) Localization of neurofibrillary tangles and beta-amyloid plaques in the brains of living patients with Alzheimer disease. *Am J Geriatr Psychiatry* 10: 24-35.
8. Smid LM, Vovko TD, Popovic M, Petric A, Kepe V, et al. (2006) The 2,6-disubstituted naphthalene derivative FDDNP labeling reliably predicts Congo red birefringence of protein deposits in brain sections of selected human neurodegenerative diseases. *Brain Pathol* 16: 124-130.
