# Supplementary material for: Towards a Pharmacophore for Amyloid
Source: PLoS Biol. 2011 Jun 14;9(6):e1001080. doi: 10.1371/journal.pbio.1001080 (PMC3114762; doi:10.1371/journal.pbio.1001080)
Supplement: Table S2 — Data collection and refinement statistics (molecular replacement). (PDF) [file pbio.1001080.s008.pdf]

## Towards a Pharmacophore for Amyloid

Meytal Landau, Michael R. Sawaya, Kym F. Faull, Arthur Laganowsky, Lin Jiang, Stuart A. Sievers, Jie Liu, Jorge R. Barrio and David Eisenberg

**Supporting Table S2**

|                                                                                           | <b>KLVFFA/orange-G</b>    | <b>VQIVYK/orange-G</b>    |
|-------------------------------------------------------------------------------------------|---------------------------|---------------------------|
| <b>PDB accession code</b>                                                                 | 3OVJ                      | 3OVL                      |
| <b>Data Collection</b>                                                                    |                           |                           |
| <b>Beamline</b>                                                                           | APS 24-ID-E               | APS 24-ID-E               |
| <b>Date</b>                                                                               | 2008/11/15 and 2009/11/13 | 2008/11/17                |
| <b>Space group</b>                                                                        | P 1                       | C 2                       |
| <b>Cell dimensions:</b>                                                                   |                           |                           |
| <b>a, b, c (Å)</b>                                                                        | 9.54, 26.01, 25.80        | 55.06, 4.83, 22.13        |
| <b><math>\alpha, \beta, \gamma</math> (°)</b>                                             | 62.3, 88.6, 88.5          | 90.0, 103.0, 90.0         |
| <b>Resolution range (Å) <sup>(*)</sup></b>                                                | 26.01 - 1.8 (1.9 - 1.8)   | 55.06 - 1.8 (1.9 - 1.8)   |
| <b>R<sub>merge</sub> (square) (%) <sup>(*)(a)</sup></b>                                   | 18.9 (42.3)               | 17.9 (48.9)               |
| <b>I/<math>\sigma</math>I <sup>(*)</sup></b>                                              | 4.38 (1.87)               | 3.55 (1.20)               |
| <b>Completeness (%) <sup>(*)(b)</sup></b>                                                 | 91.5 (71.7)               | 87.6 (71.0)               |
| <b>Redundancy <sup>(*)</sup></b>                                                          | 3.8 (1.7)                 | 2.4 (1.4)                 |
| <b>Unique Reflections</b>                                                                 | 1870                      | 587                       |
| <b>Refinement</b>                                                                         |                           |                           |
| <b>Resolution range (Å) <sup>(*)</sup></b>                                                | 23.0 - 1.8 (2.0 - 1.8)    | 26.8 – 1.8 (2.0 - 1.8)    |
| <b>Unique Reflections</b>                                                                 | 1692                      | 525                       |
| <b>R<sub>work</sub>(%) <sup>(*)(c)</sup> / R<sub>free</sub> (%) <sup>(*)(d) (e)</sup></b> | 20.5 (28.9) / 22.0 (36.6) | 25.9 (37.7) / 26.0 (44.8) |
| <b>Completeness (%) <sup>(*)(b)</sup></b>                                                 | 92.9 (79.9)               | 88.0 (76.4)               |
| <b>Observations/parameters ratio</b>                                                      | 1.6                       | 1.5                       |
| <b>Test set size [%], selection</b>                                                       | 9.2, random               | 10.4, random              |

|                                              |      |      |
|----------------------------------------------|------|------|
| <b>Number of atoms in asymm. unit</b>        | 273  | 88   |
| <b>Protein</b>                               | 208  | 53   |
| <b>Ligand</b>                                | 54   | 33   |
| <b>Water</b>                                 | 11   | 2    |
| <b>Average B-factor (Å<sup>2</sup>):</b>     |      |      |
| <b>Average B factor for main-chain atoms</b> | 12.0 | 12.4 |
| <b>Average B factor for side-chain atoms</b> | 16.1 | 14.7 |
| <b>Average B factor for ligands</b>          | 23.3 | 27.1 |
| <b>Average B factor for water</b>            | 25.4 | 28.4 |
| <b>R.m.s. deviations:</b>                    |      |      |
| <b>r.m.s.d. bond length (Å)</b>              | 0.01 | 0.01 |
| <b>r.m.s.d. bond angles (°)</b>              | 1.69 | 1.22 |
| <b>R.m.s. B:</b>                             |      |      |
| <b>R.m.s. B for main chain atoms</b>         | 1.0  | 0.9  |
| <b>R.m.s. B for side-chain atoms</b>         | 2.7  | 2.9  |
| <b>R.m.s. B for ligands</b>                  | 7.0  | 2.0  |

**Table S2. Data collection and refinement statistics (molecular replacement).**

(\*) Values in brackets are for the highest resolution shells.

(a)  $R_{merge}(square) = \sum (I - I(mean))^2 / \sum I^2$ , where  $I$  is the observed intensity of the reflection HKL and the sum is taken over all reflections HKL.

(b) The incompleteness (<80%) of the highest resolution shell is likely due to the rapid decay of the peptide crystals that are naturally susceptible to radiation decay due to their small size.

$$(c) R_{work} = \sum \|F_o\| - \|F_c\| / \sum \|F_o\|.$$

(d)  $R_{free}$  as defined by [1].

(e) The statistical significance of  $R_{free}$  is limited in the case of peptide structures, where the small size of the unit cell leads to a paucity of reflections. In these cases, the  $R_{free}$  statistic has proven to be a useful, but less sensitive tool compared with  $R_{free}$  statistics reported from macromolecular structure.

## **Reference**

1. Brunger AT (1992) Free R value: a novel statistical quantity for assessing the accuracy of crystal structures. *Nature* 355: 472-475.
